# Supplementary material
Source: ML conference proceedings conference paper supplement (https://proceedings.mlr.press/v48/lid16.html)
Supplement: Supplementary file [file lid16-supp.pdf]

---

## Appendix : Stochastic Variance Reduced Optimization for Nonconvex Sparse Learning

---

### A. Proof of Lemma 3.4

For any  $\mathbf{w}, \mathbf{w}' \in \mathbb{R}^d$  in sparse linear model, we have  $\nabla^2 \mathcal{F}(\mathbf{w}) = \mathbf{A}^\top \mathbf{A}$  and

$$\mathcal{F}(\mathbf{w}) - \mathcal{F}(\mathbf{w}') - \langle \nabla \mathcal{F}(\mathbf{w}'), \mathbf{w} - \mathbf{w}' \rangle = \frac{1}{2}(\mathbf{w} - \mathbf{w}')^\top \nabla^2 \mathcal{F}(\mathbf{w}'')(\mathbf{w} - \mathbf{w}') = \frac{1}{2} \|\mathbf{A}(\mathbf{w} - \mathbf{w}')\|_2^2,$$

where  $\mathbf{w}''$  is between  $\mathbf{w}$  and  $\mathbf{w}'$  and  $\|\mathbf{w} - \mathbf{w}'\|_0 \leq 2k \leq s$ . Let  $\mathbf{v} = \mathbf{w} - \mathbf{w}'$ , then  $\|\mathbf{v}\|_0 \leq s$  and  $\|\mathbf{v}\|_1^2 \leq s\|\mathbf{v}\|_2^2$ . By (3.8), we have

$$\frac{\|\mathbf{A}\mathbf{v}\|_2^2}{nb} \geq \psi_1 \|\mathbf{v}\|_2^2 - \varphi_1 \frac{s \log d}{nb} \|\mathbf{v}\|_2^2, \text{ and } \frac{\|\mathbf{A}_{S_i^*} \mathbf{v}\|_2^2}{b} \leq \psi_2 \|\mathbf{v}\|_2^2 + \varphi_2 \frac{s \log d}{b} \|\mathbf{v}\|_2^2, \forall i \in [n],$$

which further imply

$$\rho_s^- = \inf_{\|\mathbf{v}\|_0 \leq s} \frac{\|\mathbf{A}\mathbf{v}\|_2^2}{nb\|\mathbf{v}\|_2^2} \geq \psi_1 - \varphi_1 \frac{s \log d}{nb}, \text{ and } \rho_s^+ = \sup_{\|\mathbf{v}\|_0 \leq s, i \in [n]} \frac{\|\mathbf{A}_{S_i^*} \mathbf{v}\|_2^2}{b\|\mathbf{v}\|_2^2} \leq \psi_2 + \varphi_2 \frac{s \log d}{b}. \quad (\text{A.1})$$

If  $b \geq \frac{\varphi_2 s \log d}{\psi_2}$  and  $n \geq \frac{2\varphi_1 \psi_2}{\psi_1 \varphi_2}$ , then we have  $nb \geq \frac{2\varphi_1 s \log d}{\psi_1}$ . Combining these with (A.1), we have

$$\rho_s^- \geq \frac{1}{2} \psi_1, \text{ and } \rho_s^+ \leq 2\psi_2.$$

By the definition of  $\kappa$ , this indicates  $\kappa_s = \frac{\rho_s^+}{\rho_s^-} \leq \frac{4\psi_2}{\psi_1}$ . Then for some  $C_5 \geq \frac{16C_1\psi_2^2}{\psi_1^2}$ , we have

$$k = C_5 k^* \geq C_1 \kappa_s^2 k^*.$$

### B. Proof of Theorem 3.5

For sparse linear model, we have  $\nabla \mathcal{F}(\mathbf{w}^*) = \mathbf{A}^\top \mathbf{z} / (nb)$ . Since  $\mathbf{z}$  has i.i.d.  $\mathcal{N}(0, \sigma^2)$  entries, then  $\mathbf{A}_{*j}^\top \mathbf{z} / (nb) \sim \mathcal{N}(0, \sigma^2 \|\mathbf{A}_{*j}\|_2^2 / (nb)^2)$  for any  $j \in [d]$ . Using the Mill's inequality for tail bounds of Normal distribution, we have

$$\mathbb{P} \left( \left| \frac{\mathbf{A}_{*j}^\top \mathbf{z}}{nb} \right| > 2\sigma \sqrt{\frac{\log d}{nb}} \right) = \mathbb{P} \left( \left| \frac{\mathbf{A}_{*j}^\top \mathbf{z}}{\sigma \|\mathbf{A}_{*j}\|_2} \right| > 2 \frac{\sqrt{nb \log d}}{\|\mathbf{A}_{*j}\|_2} \right) \leq \|\mathbf{A}_{*j}\|_2 \sqrt{\frac{1}{2\pi nb \log d}} \exp \left( -4 \frac{nb \log d}{\|\mathbf{A}_{*j}\|_2^2} \right).$$

This implies, using union bound and the assumption  $\frac{\max_j \|\mathbf{A}_{*j}\|_2}{\sqrt{nb}} \leq 1$ ,

$$\mathbb{P} \left( \left\| \frac{\mathbf{A}_{*j}^\top \mathbf{z}}{nb} \right\|_\infty > 2\sigma \sqrt{\frac{\log d}{nb}} \right) \leq \frac{d^{-3}}{\sqrt{\pi nb \log d}}.$$

Then we have the following result holds with probability at least  $1 - \frac{1}{\sqrt{nb \log d}} \cdot d^{-3}$

$$\|\nabla \mathcal{F}(\mathbf{w}^*)\|_\infty \leq \left\| \frac{\mathbf{A}^\top \mathbf{z}}{nb} \right\|_\infty \leq 2\sigma \sqrt{\frac{\log d}{nb}}. \quad (\text{B.1})$$

Conditioning on (B.1), it follows consequently that

$$\|\nabla_{\tilde{\mathcal{I}}} \mathcal{F}(\mathbf{w}^*)\|_2^2 \leq s \|\nabla \mathcal{F}(\mathbf{w}^*)\|_\infty^2 \leq \frac{4\sigma^2 s \log d}{nb}. \quad (\text{B.2})$$

We have from Lemma 3.4 that  $s = 2k + k^* = (2C_5 + 1)k^*$  for some constant  $C_5$  when  $n$  and  $b$  are large enough. For a given  $\varepsilon > 0$  and  $\delta \in (0, 1)$ , if

$$r \geq 4 \log \left( \frac{\mathcal{F}(\tilde{\mathbf{w}}^{(0)}) - \mathcal{F}(\mathbf{w}^*)}{\varepsilon \delta} \right),$$

then with probability at least  $1 - \delta - \frac{1}{\sqrt{nb \log d}} \cdot d^{-3}$ , we have from (3.4), (B.1) and (B.2) that

$$\|\tilde{\mathbf{w}}^{(r)} - \mathbf{w}^*\|_2 \leq c_3 \sigma \sqrt{\frac{k^* \log d}{nb}},$$

for some constant  $c_3$ , which completes the proof.

### C. Proof of Lemma 4.1

For notational convenience, define  $\mathbf{w}' = \mathcal{H}_k(\mathbf{w})$ . Let  $\text{supp}(\mathbf{w}^*) = \mathcal{I}^*$ ,  $\text{supp}(\mathbf{w}) = \mathcal{I}$ ,  $\text{supp}(\mathbf{w}') = \mathcal{I}'$ , and  $\mathbf{w}'' = \mathbf{w} - \mathbf{w}'$  with  $\text{supp}(\mathbf{w}'') = \mathcal{I}''$ . Clearly we have  $\mathcal{I}' \cup \mathcal{I}'' = \mathcal{I}$ ,  $\mathcal{I}' \cap \mathcal{I}'' = \emptyset$ , and  $\|\mathbf{w}\|_2^2 = \|\mathbf{w}'\|_2^2 + \|\mathbf{w}''\|_2^2$ . Then we have that

$$\|\mathbf{w}' - \mathbf{w}^*\|_2^2 - \|\mathbf{w} - \mathbf{w}^*\|_2^2 = \|\mathbf{w}'\|_2^2 - 2\langle \mathbf{w}', \mathbf{w}^* \rangle - \|\mathbf{w}\|_2^2 + 2\langle \mathbf{w}, \mathbf{w}^* \rangle = 2\langle \mathbf{w}'', \mathbf{w}^* \rangle - \|\mathbf{w}''\|_2^2. \quad (\text{C.1})$$

If  $2\langle \mathbf{w}'', \mathbf{w}^* \rangle - \|\mathbf{w}''\|_2^2 \leq 0$ , then (4.1) holds naturally. From this point on, we will discuss the situation when  $2\langle \mathbf{w}'', \mathbf{w}^* \rangle - \|\mathbf{w}''\|_2^2 > 0$ .

Let  $\mathcal{I}^* \cap \mathcal{I}' = \mathcal{I}^{*1}$  and  $\mathcal{I}^* \cap \mathcal{I}'' = \mathcal{I}^{*2}$ , and denote  $(\mathbf{w}^*)_{\mathcal{I}^{*1}} = \mathbf{w}^{*1}$ ,  $(\mathbf{w}^*)_{\mathcal{I}^{*2}} = \mathbf{w}^{*2}$ ,  $(\mathbf{w}')_{\mathcal{I}^{*1}} = \mathbf{w}^{*1}$ , and  $(\mathbf{w}'')_{\mathcal{I}^{*2}} = \mathbf{w}^{*2}$ . Then we have that

$$2\langle \mathbf{w}'', \mathbf{w}^* \rangle - \|\mathbf{w}''\|_2^2 = 2\langle \mathbf{w}^{*2}, \mathbf{w}^{*2} \rangle - \|\mathbf{w}''\|_2^2 \leq 2\langle \mathbf{w}^{*2}, \mathbf{w}^{*2} \rangle - \|\mathbf{w}^{*2}\|_2^2 \leq 2\|\mathbf{w}^{*2}\|_2 \|\mathbf{w}^{*2}\|_2 - \|\mathbf{w}^{*2}\|_2^2. \quad (\text{C.2})$$

Let  $|\text{supp}(\mathbf{w}^{*2})| = |\mathcal{I}^{*2}| = k^{**}$  and  $w_{2,\max} = \|\mathbf{w}^{*2}\|_\infty$ , then consequently we have  $\|\mathbf{w}^{*2}\|_2 = m \cdot w_{2,\max}$  for some  $m \in [1, \sqrt{k^{**}}]$ . Notice that we are interested in  $1 \leq k^{**} \leq k^*$ , because (4.1) holds naturally if  $k^{**} = 0$ . In terms of  $\|\mathbf{w}^{*2}\|_2$ , the RHS of (C.2) is maximized when:

Case 1:  $m = 1$ , if  $\|\mathbf{w}^{*2}\|_2 \leq w_{2,\max}$ ;

Case 2:  $m = \frac{\|\mathbf{w}^{*2}\|_2}{w_{2,\max}}$ , if  $w_{2,\max} < \|\mathbf{w}^{*2}\|_2 < \sqrt{k^{**}} w_{2,\max}$ ;

Case 3:  $m = \sqrt{k^{**}}$ , if  $\|\mathbf{w}^{*2}\|_2 \geq \sqrt{k^{**}} w_{2,\max}$ .

Case 1: If  $\|\mathbf{w}^{*2}\|_2 \leq w_{2,\max}$ , then the RHS of (C.2) is maximized when  $m = 1$ , i.e.  $\mathbf{w}^{*2}$  has only one nonzero element  $w_{2,\max}$ . By (C.2), we have

$$2\langle \mathbf{w}'', \mathbf{w}^* \rangle - \|\mathbf{w}''\|_2^2 \leq 2w_{2,\max} \|\mathbf{w}^{*2}\|_2 - w_{2,\max}^2 \leq 2w_{2,\max}^2 - w_{2,\max}^2 = w_{2,\max}^2. \quad (\text{C.3})$$

Denote  $w_{1,\min}$  as the smallest element of  $\mathbf{w}^{*1}$  (in magnitude), which indicates that  $|w_{1,\min}| \geq |w_{2,\max}|$  as  $\mathbf{w}'$  contains the largest  $k$  entries and  $\mathbf{w}''$  contains the smallest  $d - k$  entries of  $\mathbf{w}$ . For  $\|\mathbf{w} - \mathbf{w}^*\|_2^2$ , we have that

$$\begin{aligned} \|\mathbf{w} - \mathbf{w}^*\|_2^2 &= \|\mathbf{w}' - \mathbf{w}^{*1}\|_2^2 + \|\mathbf{w}'' - \mathbf{w}^{*2}\|_2^2 \\ &= \|\mathbf{w}_{(\mathcal{I}^{*1})^c}\|_2^2 + \|\mathbf{w}_{\mathcal{I}^{*1}} - \mathbf{w}^{*1}\|_2^2 + \|\mathbf{w}^{*2}\|_2^2 - (2\langle \mathbf{w}'', \mathbf{w}^* \rangle - \|\mathbf{w}''\|_2^2) \end{aligned} \quad (\text{C.4})$$

$$\geq (k - k^* + k^{**})w_{1,\min}^2 - w_{2,\max}^2 \quad (\text{C.5})$$

where the last inequality follows from the fact that  $\mathbf{w}_{(\mathcal{I}^{*1})^c}$  has  $k - k^* + k^{**}$  entries larger than  $w_{1,\min}$  (in magnitude). Combining (C.1), (C.3) and (C.5), we have that

$$\begin{aligned} \frac{\|\mathbf{w}' - \mathbf{w}^*\|_2^2 - \|\mathbf{w} - \mathbf{w}^*\|_2^2}{\|\mathbf{w} - \mathbf{w}^*\|_2^2} &\leq \frac{w_{2,\max}^2}{(k - k^* + k^{**})w_{1,\min}^2 - w_{2,\max}^2} \\ &\leq \frac{w_{2,\max}^2}{(k - k^* + k^{**})w_{2,\max}^2 - w_{2,\max}^2} \leq \frac{1}{k - k^*}. \end{aligned} \quad (\text{C.6})$$

Case 2: If  $w_{2,\max} < \|\mathbf{w}^{*2}\|_2 < \sqrt{k^{**}}w_{2,\max}$ , then the RHS of (C.2) is maximized when  $m = \frac{\|\mathbf{w}^{*2}\|_2}{w_{2,\max}}$ . By (C.2), we have that

$$2\langle \mathbf{w}'', \mathbf{w}^* \rangle - \|\mathbf{w}''\|_2^2 \leq 2\sqrt{k^{**}}w_{2,\max} \cdot mw_{2,\max} - w_{2,\max}^2 \leq k^{**}w_{2,\max}^2. \quad (\text{C.7})$$

By (C.4), we have that

$$\|\mathbf{w} - \mathbf{w}^*\|_2^2 \geq (k - k^* + k^{**})w_{1,\min}^2 + m^2w_{2,\max}^2 - w_{2,\max}^2 \geq (k - k^* + k^{**})w_{1,\min}^2. \quad (\text{C.8})$$

Combining (C.1), (C.7) and (C.8), we have that

$$\frac{\|\mathbf{w}' - \mathbf{w}^*\|_2^2 - \|\mathbf{w} - \mathbf{w}^*\|_2^2}{\|\mathbf{w} - \mathbf{w}^*\|_2^2} \leq \frac{k^{**}w_{2,\max}^2}{(k - k^* + k^{**})w_{1,\min}^2} \leq \frac{k^{**}}{k - k^* + k^{**}}. \quad (\text{C.9})$$

Case 3: If  $\|\mathbf{w}^{*2}\|_2 \geq \sqrt{k^{**}}w_{2,\max}$ , then the RHS of (C.2) is maximized when  $m = \sqrt{k^{**}}$ . Let  $\|\mathbf{w}^{*2}\|_2 = \gamma w_{2,\max}$  for some  $\gamma \geq \sqrt{k^{**}}$ . We have from (C.2) that

$$2\langle \mathbf{w}'', \mathbf{w}^* \rangle - \|\mathbf{w}''\|_2^2 \leq 2\gamma\sqrt{k^{**}}w_{2,\max}^2 - k^{**}w_{2,\max}^2. \quad (\text{C.10})$$

By (C.4), we have

$$\|\mathbf{w} - \mathbf{w}^*\|_2^2 \geq (k - k^* + k^{**})w_{1,\min}^2 + \gamma^2w_{2,\max}^2 - \gamma\sqrt{k^{**}}w_{2,\max}^2 + k^{**}w_{2,\max}^2. \quad (\text{C.11})$$

Combining (C.1), (C.10) and (C.11), we have

$$\begin{aligned} \frac{\|\mathbf{w}' - \mathbf{w}^*\|_2^2 - \|\mathbf{w} - \mathbf{w}^*\|_2^2}{\|\mathbf{w} - \mathbf{w}^*\|_2^2} &\leq \frac{2\gamma\sqrt{k^{**}}w_{2,\max}^2 - k^{**}w_{2,\max}^2}{(k - k^* + k^{**})w_{1,\min}^2 + \gamma^2w_{2,\max}^2 - \gamma\sqrt{k^{**}}w_{2,\max}^2 + k^{**}w_{2,\max}^2} \\ &\leq \frac{2\gamma\sqrt{k^{**}} - k^{**}}{k - k^* + 2k^{**} + \gamma^2 - 2\gamma\sqrt{k^{**}}}. \end{aligned} \quad (\text{C.12})$$

Inspecting the RHS of (C.12) carefully, we can see that it is either a bell shape function or a monotone decreasing function when  $\gamma \geq \sqrt{k^{**}}$ . Setting the first derivative of the RHS in terms of  $\gamma$  to zero, we have  $\gamma = \frac{1}{2}\sqrt{k^{**}} + \sqrt{k - k^* + \frac{5}{4}k^{**}}$  (the other root is smaller than  $\sqrt{k^{**}}$ ). Denoting  $\gamma_* = \max\{\sqrt{k^{**}}, \frac{1}{2}\sqrt{k^{**}} + \sqrt{k - k^* + \frac{5}{4}k^{**}}\}$  and plugging it into the RHS of (C.12), we have

$$\frac{\|\mathbf{w}' - \mathbf{w}^*\|_2^2 - \|\mathbf{w} - \mathbf{w}^*\|_2^2}{\|\mathbf{w} - \mathbf{w}^*\|_2^2} \leq \max \left\{ \frac{k^{**}}{k - k^* + k^{**}}, \frac{2\sqrt{k^{**}}}{2\sqrt{k - k^* + \frac{5}{4}k^{**}} - \sqrt{k^{**}}} \right\}. \quad (\text{C.13})$$

Combining (C.6), (C.9) and (C.13), and taking  $k > k^*$  and  $k^* \geq k^{**} \geq 1$  into consideration, we have

$$\begin{aligned} \max \left\{ \frac{1}{k - k^*}, \frac{k^{**}}{k - k^* + k^{**}}, \frac{2\sqrt{k^{**}}}{2\sqrt{k - k^* + \frac{5}{4}k^{**}} - \sqrt{k^{**}}} \right\} &\leq \frac{2\sqrt{k^{**}}}{2\sqrt{k - k^* + \frac{5}{4}k^{**}} - \sqrt{k^{**}}} \\ &\leq \frac{2\sqrt{k^*}}{2\sqrt{k - k^*} - \sqrt{k^*}} \leq \frac{2\sqrt{k^*}}{\sqrt{k - k^*}}, \end{aligned}$$

which proves the result.

## D. Proof of Lemma 4.3

Remind that the stochastic variance reduced gradient is

$$\mathbf{g}^{(t)}(\mathbf{w}^{(t)}) = \nabla f_{i_t}(\mathbf{w}^{(t)}) - \nabla f_{i_t}(\tilde{\mathbf{w}}) + \tilde{\boldsymbol{\mu}}, \quad (\text{D.1})$$

where  $\tilde{\boldsymbol{\mu}} = \nabla \mathcal{F}(\tilde{\boldsymbol{w}}) = \frac{1}{n} \sum_{i=1}^n \nabla f_i(\tilde{\boldsymbol{w}})$ .

It is straightforward that the stochastic variance reduced gradient (D.1) satisfies

$$\mathbb{E} \mathbf{g}^{(t)}(\mathbf{w}^{(t)}) = \mathbb{E} \nabla f_{i_t}(\mathbf{w}^{(t)}) - \mathbb{E} \nabla f_{i_t}(\tilde{\boldsymbol{w}}) + \tilde{\boldsymbol{\mu}} = \nabla \mathcal{F}(\mathbf{w}^{(t)}),$$

Thus  $\mathbf{g}^{(t)}(\mathbf{w}^{(t)})$  is an unbiased estimate of  $\nabla \mathcal{F}(\mathbf{w}^{(t)})$  and the first claim is verified.

Next, we bound  $\mathbb{E} \|\mathbf{g}_{\mathcal{I}}^{(t)}(\mathbf{w}^{(t)})\|_2^2$ . For any  $i \in [n]$  and  $\mathbf{w}$  with  $\text{supp}(\mathbf{w}) \subseteq \mathcal{I}$ , consider

$$\phi_i(\mathbf{w}) = f_i(\mathbf{w}) - f_i(\mathbf{w}^*) - \langle \nabla f_i(\mathbf{w}^*), \mathbf{w} - \mathbf{w}^* \rangle.$$

Since  $\nabla \phi_i(\mathbf{w}^*) = \nabla f_i(\mathbf{w}^*) - \nabla f_i(\mathbf{w}^*) = \mathbf{0}$ , we have that  $\phi_i(\mathbf{w}^*) = \min_{\mathbf{w}} \phi_i(\mathbf{w})$ , which implies

$$\begin{aligned} 0 = \phi_i(\mathbf{w}^*) &\leq \min_{\boldsymbol{\eta}} \phi_i(\mathbf{w} - \boldsymbol{\eta} \nabla \phi_i(\mathbf{w})) \leq \min_{\boldsymbol{\eta}} \phi_i(\mathbf{w}) - \boldsymbol{\eta} \|\nabla \phi_i(\mathbf{w})\|_2^2 + \frac{\rho_s^+ \boldsymbol{\eta}^2}{2} \|\nabla \phi_i(\mathbf{w})\|_2^2 \\ &= \phi_i(\mathbf{w}) - \frac{1}{2\rho_s^+} \|\nabla \phi_i(\mathbf{w})\|_2^2, \end{aligned} \quad (\text{D.2})$$

where the last inequality follows from the RSS condition and the last equality follows from the fact that  $\boldsymbol{\eta} = 1/\rho_s^+$  minimizes the function. By (D.2), we have

$$\begin{aligned} \|\nabla_{\mathcal{I}} f_i(\mathbf{w}) - \nabla_{\mathcal{I}} f_i(\mathbf{w}^*)\|_2^2 &\leq \|\nabla f_i(\mathbf{w}) - \nabla f_i(\mathbf{w}^*)\|_2^2 \\ &\leq 2\rho_s^+ [f_i(\mathbf{w}) - f_i(\mathbf{w}^*) - \langle \nabla f_i(\mathbf{w}^*), \mathbf{w} - \mathbf{w}^* \rangle] \\ &= 2\rho_s^+ [f_i(\mathbf{w}) - f_i(\mathbf{w}^*) - \langle \nabla_{\mathcal{I}} f_i(\mathbf{w}^*), \mathbf{w} - \mathbf{w}^* \rangle]. \end{aligned} \quad (\text{D.3})$$

Since the sampling of  $i$  from  $[n]$  is uniform sampling, we have from (D.3)

$$\begin{aligned} \mathbb{E} \|\nabla_{\mathcal{I}} f_i(\mathbf{w}) - \nabla_{\mathcal{I}} f_i(\mathbf{w}^*)\|_2^2 &= \frac{1}{n} \sum_{i=1}^n \|\nabla_{\mathcal{I}} f_i(\mathbf{w}) - \nabla_{\mathcal{I}} f_i(\mathbf{w}^*)\|_2^2 \\ &\leq 2\rho_s^+ [\mathcal{F}(\mathbf{w}) - \mathcal{F}(\mathbf{w}^*) - \langle \nabla_{\mathcal{I}} \mathcal{F}(\mathbf{w}^*), \mathbf{w} - \mathbf{w}^* \rangle] \\ &\leq 2\rho_s^+ [\mathcal{F}(\mathbf{w}) - \mathcal{F}(\mathbf{w}^*) + |\langle \nabla_{\mathcal{I}} \mathcal{F}(\mathbf{w}^*), \mathbf{w} - \mathbf{w}^* \rangle|] \\ &\leq 4\rho_s^+ [\mathcal{F}(\mathbf{w}) - \mathcal{F}(\mathbf{w}^*)], \end{aligned} \quad (\text{D.4})$$

where the last inequality is from the RSC condition of  $\mathcal{F}(\mathbf{w})$ .

By the definition of  $\mathbf{g}_{\mathcal{I}}^{(t)}$  in (D.1), we can verify the second claim as

$$\begin{aligned} \mathbb{E} \|\mathbf{g}_{\mathcal{I}}^{(t)}(\mathbf{w}^{(t)})\|_2^2 &\leq 3\mathbb{E} \|\nabla_{\mathcal{I}} f_{i_t}(\tilde{\boldsymbol{w}}) - \nabla_{\mathcal{I}} f_{i_t}(\mathbf{w}^*)\|_2^2 + 3\mathbb{E} \|\nabla_{\mathcal{I}} \mathcal{F}(\tilde{\boldsymbol{w}}) - \nabla_{\mathcal{I}} \mathcal{F}(\mathbf{w}^*)\|_2^2 \\ &\quad + 3\mathbb{E} \|\nabla_{\mathcal{I}} f_{i_t}(\mathbf{w}^{(t)}) - \nabla_{\mathcal{I}} f_{i_t}(\mathbf{w}^*)\|_2^2 + 3\|\nabla_{\mathcal{I}} \mathcal{F}(\mathbf{w}^*)\|_2^2 \\ &\leq 3\mathbb{E} \|\nabla_{\mathcal{I}} f_{i_t}(\mathbf{w}^{(t)}) - \nabla_{\mathcal{I}} f_{i_t}(\mathbf{w}^*)\|_2^2 + 3\mathbb{E} \|\nabla_{\mathcal{I}} f_{i_t}(\tilde{\boldsymbol{w}}) - \nabla_{\mathcal{I}} f_{i_t}(\mathbf{w}^*)\|_2^2 + 3\|\nabla_{\mathcal{I}} \mathcal{F}(\mathbf{w}^*)\|_2^2 \\ &\leq 12\rho_s^+ [\mathcal{F}(\mathbf{w}^{(t)}) - \mathcal{F}(\mathbf{w}^*) + \mathcal{F}(\tilde{\boldsymbol{w}}) - \mathcal{F}(\mathbf{w}^*)] + 3\|\nabla_{\mathcal{I}} \mathcal{F}(\mathbf{w}^*)\|_2^2, \end{aligned}$$

where the first inequality follows from  $\|\mathbf{a} + \mathbf{b} + \mathbf{c}\|_2^2 \leq 3\|\mathbf{a}\|_2^2 + 3\|\mathbf{b}\|_2^2 + 3\|\mathbf{c}\|_2^2$ , the second inequality follows from  $\mathbb{E} \|\mathbf{x} - \mathbb{E}\mathbf{x}\|_2^2 \leq \mathbb{E} \|\mathbf{x}\|_2^2$  with  $\mathbb{E} \|\nabla_{\mathcal{I}} f_{i_t}(\tilde{\boldsymbol{w}}) - \nabla_{\mathcal{I}} f_{i_t}(\mathbf{w}^*)\|_2^2 = \|\nabla_{\mathcal{I}} \mathcal{F}(\tilde{\boldsymbol{w}}) - \nabla_{\mathcal{I}} \mathcal{F}(\mathbf{w}^*)\|_2^2$ , and the last inequality follows from (D.4).
